# Supplementary material
Source: Springer Nature journal article supplement (https://www.springermedizin.de/resource/supplementary/12937_2013_648_MOESM2_ESM.pdf/25653866)

## 2006 Measured vs. Predicted TEE

Total Energy Expenditure (kcal/d)

- DLW Measured TEE
- WHO Predicted TEE
- DRI Predicted TEE

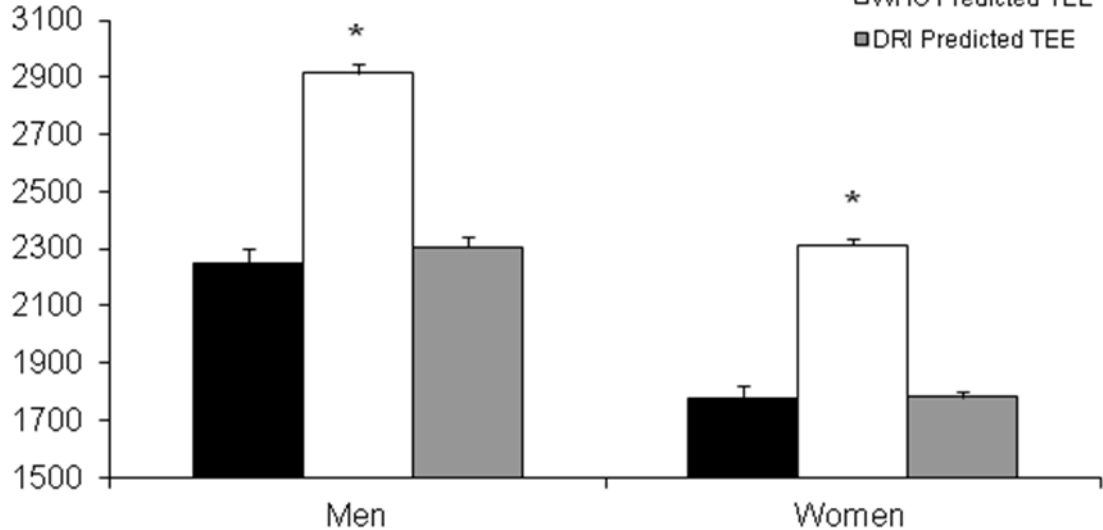

Supplement: MOESM2 [file 25653866]
